# Supplementary material for: A new magnesium-containing aluminophosphate with a zeolite-like structure
Source: Royal Society of Chemistry journal article supplement (doi:10.1039/c5ra22194c), 2015-12-08
Supplement: c5ra22194c1.pdf [file c5ra22194c1.pdf]

## **Electronic Supplementary Information**

# **A New Magnesium-Containing Aluminophosphate with Zeolite-Like Structure**

**Xuejiao Jiao, Yanyan Wang, Ying Mu, Yanjun Sun, Jiyang Li\***

*State Key Laboratory of Inorganic Synthesis and Preparative Chemistry, College of Chemistry,*

*Jilin University, Changchun 130012, P. R. China. Fax: (+86) 431-85168608; E-mail:*

*lijiyang@jlu.edu.cn; jihong@jlu.edu.cn*

**Table S1.** The bond lengths [Å] and angles [deg] for JU96.

|                     |            |                  |            |
|---------------------|------------|------------------|------------|
| Mg(1)-O(6)          | 1.999(3)   | P(2)-O(11)       | 1.527(3)   |
| Mg(1)-O(12)#1       | 2.026(3)   | P(2)-O(5)        | 1.535(3)   |
| Mg(1)-O(17)         | 2.073(3)   | P(2)-O(4)        | 1.544(3)   |
| Mg(1)-O(16)         | 2.098(3)   | P(3)-O(12)       | 1.487(3)   |
| Mg(1)-O(2)          | 2.109(3)   | P(3)-O(8)        | 1.527(3)   |
| Mg(1)-O(18)         | 2.236(3)   | P(3)-O(14)       | 1.539(3)   |
| Al(1)-O(13)#2       | 1.722(3)   | P(3)-O(1)        | 1.548(3)   |
| Al(1)-O(7)          | 1.726(3)   | P(4)-O(17)       | 1.483(3)   |
| Al(1)-O(15)#3       | 1.734(3)   | P(4)-O(9)        | 1.525(3)   |
| Al(1)-O(14)#4       | 1.740(3)   | P(4)-O(13)       | 1.532(3)   |
| Al(2)-O(9)          | 1.715(3)   | P(4)-O(15)       | 1.540(3)   |
| Al(2)-O(5)#5        | 1.726(3)   | O(5)-Al(2)#1     | 1.726(3)   |
| Al(2)-O(1)          | 1.745(3)   | O(8)-Al(3)#8     | 1.726(3)   |
| Al(2)-O(4)          | 1.746(3)   | O(10)-Al(3)#9    | 1.736(3)   |
| Al(3)-O(11)#6       | 1.715(3)   | O(11)-Al(3)#10   | 1.715(3)   |
| Al(3)-O(8)#4        | 1.726(3)   | O(12)-Mg(1)#5    | 2.026(3)   |
| Al(3)-O(10)#7       | 1.736(3)   | O(13)-Al(1)#11   | 1.722(3)   |
| Al(3)-O(3)          | 1.751(3)   | O(14)-Al(1)#8    | 1.740(3)   |
| P(1)-O(2)           | 1.503(3)   | O(15)-Al(1)#3    | 1.734(3)   |
| P(1)-O(7)           | 1.525(3)   | N(1)-C(3)        | 1.470(6)   |
| P(1)-O(10)          | 1.542(3)   | N(1)-C(2)        | 1.504(6)   |
| P(1)-O(3)           | 1.543(3)   | C(2)-C(3)#12     | 1.486(7)   |
| P(2)-O(6)           | 1.483(3)   | C(3)-C(2)#12     | 1.486(7)   |
| O(6)-Mg(1)-O(12)#1  | 97.30(13)  | O(10)-P(1)-O(3)  | 107.19(16) |
| O(6)-Mg(1)-O(17)    | 92.87(13)  | O(6)-P(2)-O(11)  | 111.68(17) |
| O(12)#1-Mg(1)-O(17) | 90.72(13)  | O(6)-P(2)-O(5)   | 113.24(16) |
| O(6)-Mg(1)-O(16)    | 171.54(14) | O(11)-P(2)-O(5)  | 107.71(17) |
| O(12)#1-Mg(1)-O(16) | 91.11(13)  | O(6)-P(2)-O(4)   | 111.11(17) |
| O(17)-Mg(1)-O(16)   | 86.13(14)  | O(11)-P(2)-O(4)  | 107.49(16) |
| O(6)-Mg(1)-O(2)     | 89.29(12)  | O(5)-P(2)-O(4)   | 105.23(16) |
| O(12)#1-Mg(1)-O(2)  | 96.51(12)  | O(12)-P(3)-O(8)  | 113.43(16) |
| O(17)-Mg(1)-O(2)    | 172.14(14) | O(12)-P(3)-O(14) | 111.31(17) |
| O(16)-Mg(1)-O(2)    | 90.63(13)  | O(8)-P(3)-O(14)  | 108.26(17) |
| O(6)-Mg(1)-O(18)    | 87.84(13)  | O(12)-P(3)-O(1)  | 112.14(16) |
| O(12)#1-Mg(1)-O(18) | 174.84(14) | O(8)-P(3)-O(1)   | 105.58(16) |
| O(17)-Mg(1)-O(18)   | 88.61(13)  | O(14)-P(3)-O(1)  | 105.65(15) |
| O(16)-Mg(1)-O(18)   | 83.74(14)  | O(17)-P(4)-O(9)  | 112.49(18) |
| O(2)-Mg(1)-O(18)    | 83.91(12)  | O(17)-P(4)-O(13) | 112.25(19) |
| O(13)#2-Al(1)-O(7)  | 108.33(15) | O(9)-P(4)-O(13)  | 108.06(17) |

|                       |            |                     |            |
|-----------------------|------------|---------------------|------------|
| O(13)#2-Al(1)-O(15)#3 | 107.65(14) | O(17)-P(4)-O(15)    | 111.79(18) |
| O(7)-Al(1)-O(15)#3    | 110.02(14) | O(9)-P(4)-O(15)     | 106.27(16) |
| O(13)#2-Al(1)-O(14)#4 | 110.33(15) | O(13)-P(4)-O(15)    | 105.55(16) |
| O(7)-Al(1)-O(14)#4    | 110.55(15) | P(3)-O(1)-Al(2)     | 136.62(19) |
| O(15)#3-Al(1)-O(14)#4 | 109.90(14) | P(1)-O(2)-Mg(1)     | 137.41(16) |
| O(9)-Al(2)-O(5)#5     | 108.87(15) | P(1)-O(3)-Al(3)     | 141.95(19) |
| O(9)-Al(2)-O(1)       | 109.75(14) | P(2)-O(4)-Al(2)     | 131.81(18) |
| O(5)#5-Al(2)-O(1)     | 113.88(14) | P(2)-O(5)-Al(2)#1   | 146.05(19) |
| O(9)-Al(2)-O(4)       | 110.67(15) | P(2)-O(6)-Mg(1)     | 141.10(18) |
| O(5)#5-Al(2)-O(4)     | 109.99(15) | P(1)-O(7)-Al(1)     | 141.98(19) |
| O(1)-Al(2)-O(4)       | 103.60(14) | P(3)-O(8)-Al(3)#8   | 150.4(2)   |
| O(11)#6-Al(3)-O(8)#4  | 109.96(15) | P(4)-O(9)-Al(2)     | 155.0(2)   |
| O(11)#6-Al(3)-O(10)#7 | 109.41(15) | P(1)-O(10)-Al(3)#9  | 138.26(18) |
| O(8)#4-Al(3)-O(10)#7  | 110.67(14) | P(2)-O(11)-Al(3)#10 | 171.6(2)   |
| O(11)#6-Al(3)-O(3)    | 107.81(15) | P(3)-O(12)-Mg(1)#5  | 150.21(19) |
| O(8)#4-Al(3)-O(3)     | 109.25(15) | P(4)-O(13)-Al(1)#11 | 139.7(2)   |
| O(10)#7-Al(3)-O(3)    | 109.68(14) | P(3)-O(14)-Al(1)#8  | 138.69(18) |
| O(2)-P(1)-O(7)        | 111.73(16) | P(4)-O(15)-Al(1)#3  | 136.15(18) |
| O(2)-P(1)-O(10)       | 112.61(16) | P(4)-O(17)-Mg(1)    | 148.0(2)   |
| O(7)-P(1)-O(10)       | 107.28(16) | C(3)-N(1)-C(2)      | 110.8(3)   |
| O(2)-P(1)-O(3)        | 108.64(15) | C(3)#12-C(2)-N(1)   | 110.2(4)   |
| O(7)-P(1)-O(3)        | 109.24(16) | N(1)-C(3)-C(2)#12   | 110.4(4)   |

For JU96 Symmetry transformations used to generate equivalent atoms:

#1  $x, -y+3/2, z+1/2$     #2  $-x+2, y+1/2, -z+1/2$   
#3  $-x+2, -y+2, -z+1$     #4  $x, y+1, z$     #5  $x, -y+3/2, z-1/2$   
#6  $-x+1, y+1/2, -z+1/2$     #7  $x, -y+5/2, z-1/2$   
#8  $x, y-1, z$     #9  $x, -y+5/2, z+1/2$     #10  $-x+1, y-1/2, -z+1/2$   
#11  $-x+2, y-1/2, -z+1/2$     #12  $-x+1, -y, -z$
